# Supplementary material for: New full-color-emitting phosphor, Eu2+-doped Na2−xAl2−xSixO4 (0 ≤x≤ 1), obtained using phase transitions for solid-state white lighting
Source: Royal Society of Chemistry journal article supplement (doi:10.1039/c2jm15501j), 2012-01-01
Supplement: c2jm15501j.pdf [file c2jm15501j.pdf]

## Supplementary Information

**Table S1** Structure parameter of  $\text{Na}_{1.75}\text{Al}_{1.75}\text{Si}_{0.25}\text{O}_4:\text{Eu}^{2+}$  phosphor, the number of Na site and site-symmetry for given coordination number (CN) with various  $x$  values

| $x$  | Na site | Site -symmetry |   | CN |
|------|---------|----------------|---|----|
| 0.25 | 4       | Na1-Na4        | 1 | 10 |
| 0.35 | 3       | Na1-Na2        | 2 | 10 |
|      |         | Na3            | 1 | 12 |
| 0.55 | 8       | Na1- Na4       | 3 | 9  |
|      |         | Na5- Na8       | 1 | 8  |

**Table S2** Gaussian component of  $\text{Na}_{1.75}\text{Al}_{1.75}\text{Si}_{0.25}\text{O}_4:\text{Eu}^{2+}$  phosphor ( $x = 0.25$ ) with various  $\text{Eu}^{2+}$  concentration.

| $\text{Eu}^{2+}$<br>concentration | Eu1                                 |                       | Eu2                                 |                       | Eu3                                 |                       | Eu4                                 |                       |
|-----------------------------------|-------------------------------------|-----------------------|-------------------------------------|-----------------------|-------------------------------------|-----------------------|-------------------------------------|-----------------------|
|                                   | $\lambda_{\text{centered}}$<br>(nm) | $I_{\text{relative}}$ | $\lambda_{\text{centered}}$<br>(nm) | $I_{\text{relative}}$ | $\lambda_{\text{centered}}$<br>(nm) | $I_{\text{relative}}$ | $\lambda_{\text{centered}}$<br>(nm) | $I_{\text{relative}}$ |
| 0.01                              | 466                                 | 0.65                  | 502                                 | 0.61                  | 555                                 | 0.21                  | 602                                 | 0.14                  |
| 0.02                              | 461                                 | 0.50                  | 490                                 | 0.52                  | 533                                 | 0.33                  | 603                                 | 0.22                  |
| 0.03                              | 467                                 | 0.60                  | 501                                 | 0.46                  | 561                                 | 0.43                  | 637                                 | 0.25                  |
| 0.04                              | 467                                 | 0.65                  | 505                                 | 0.45                  | 564                                 | 0.52                  | 644                                 | 0.28                  |
| 0.05                              | 470                                 | 0.61                  | 510                                 | 0.57                  | 580                                 | 0.49                  | 652                                 | 0.30                  |
| 0.06                              | 463                                 | 0.45                  | 507                                 | 0.51                  | 564                                 | 0.65                  | 647                                 | 0.27                  |

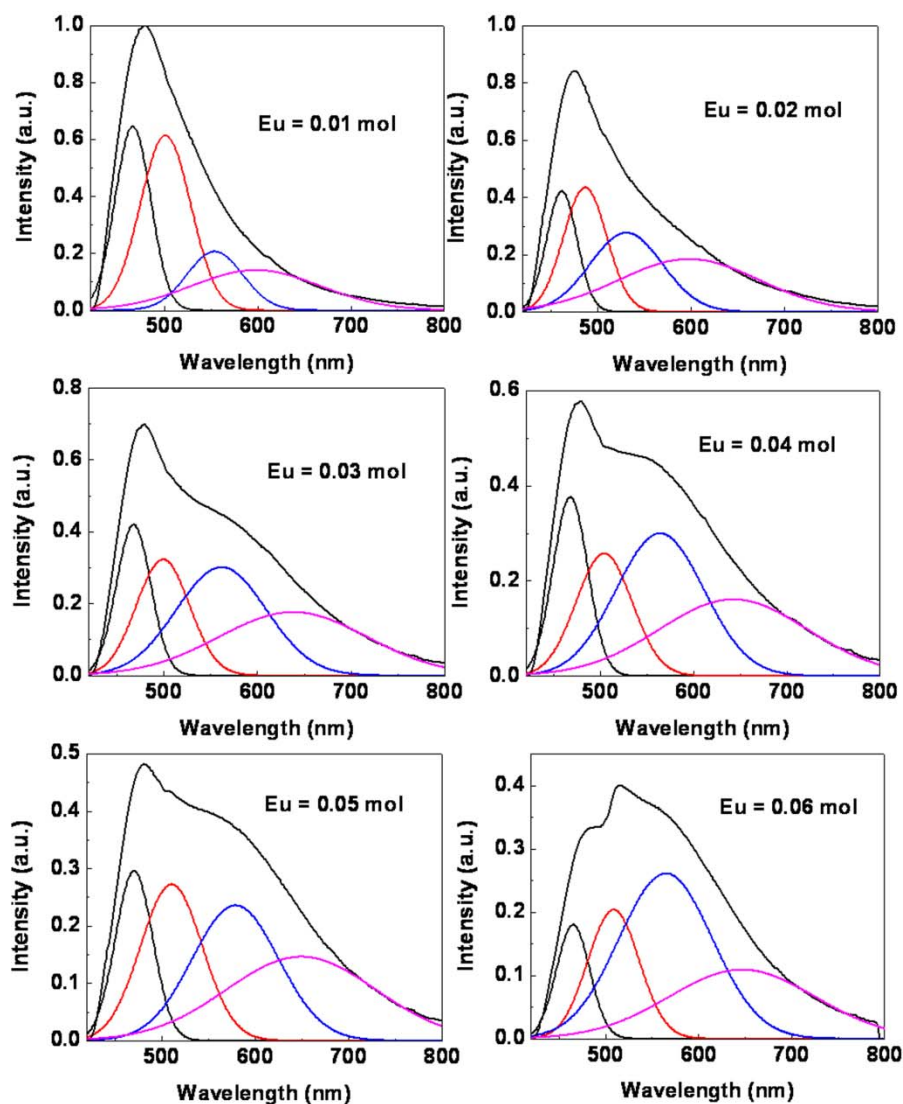

**Figure S1** Relative emission spectra and Gaussian components of  $\text{Na}_{1.75}\text{Al}_{1.75}\text{Si}_{0.25}\text{O}_4:\text{Eu}^{2+}$  phosphor as a function of  $\text{Eu}^{2+}$  concentration from 0.01 mol to 0.06 mol.

The reason for asymmetric emission band of  $\text{Na}_{1.75}\text{Al}_{1.75}\text{Si}_{0.25}\text{O}_4:\text{Eu}^{2+}$  phosphor can be explained by relative intensity among the four Gaussian components (Eu1 –Eu4). There are four substitutional sites of  $\text{Na}^+$  ion for  $\text{Eu}^{2+}$  ion. As shown in Fig. S1 the each deconvoluted Gaussian components indicates the transition of  $\text{Eu}^{2+}$  in  $\text{Na}_{1.75}\text{Al}_{1.75}\text{Si}_{0.25}\text{O}_4:\text{Eu}^{2+}$  phosphor. By substitution of  $\text{Na}^+$  sites with  $\text{Eu}^{2+}$  ion (with increasing  $\text{Eu}^{2+}$  concentration), the relative intensity among the four Gaussian components changed as shown in Fig. S1 and the central wavelength ( $\lambda_{\text{centered}}$ ) and relative intensity ( $I_{\text{relative}}$ ) with  $\text{Eu}^{2+}$  concentration was indicated in Table S2. With increasing  $\text{Eu}^{2+}$  concentration, the intensities originated from Eu3 and Eu4 increased relatively and it affected change of emission shape.
